# Supplementary material
Source: ML conference proceedings conference paper supplement (https://openaccess.thecvf.com/content/CVPR2025/html/Shao_Learning_Temporally_Consistent_CVPR_2025_paper.html)
Supplement: Supplementary file 2 [file Shao_Learning_Temporally_Consistent_CVPR_2025_supplemental.zip]

# Learning Temporally Consistent Video Depth from Video Diffusion Priors

## Supplementary Material

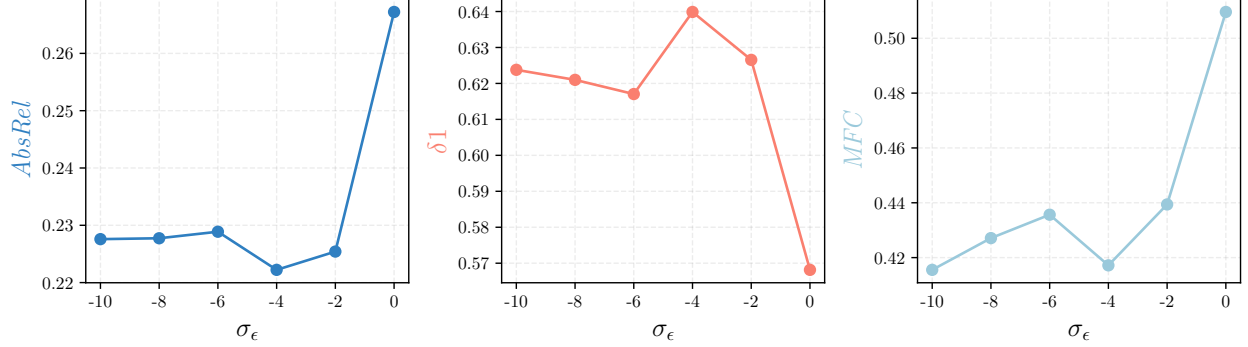

Figure S1. **Ablation Study.** We report accuracy and consistency metrics of our method on *KITTI-360* with different  $\sigma_\epsilon$ .

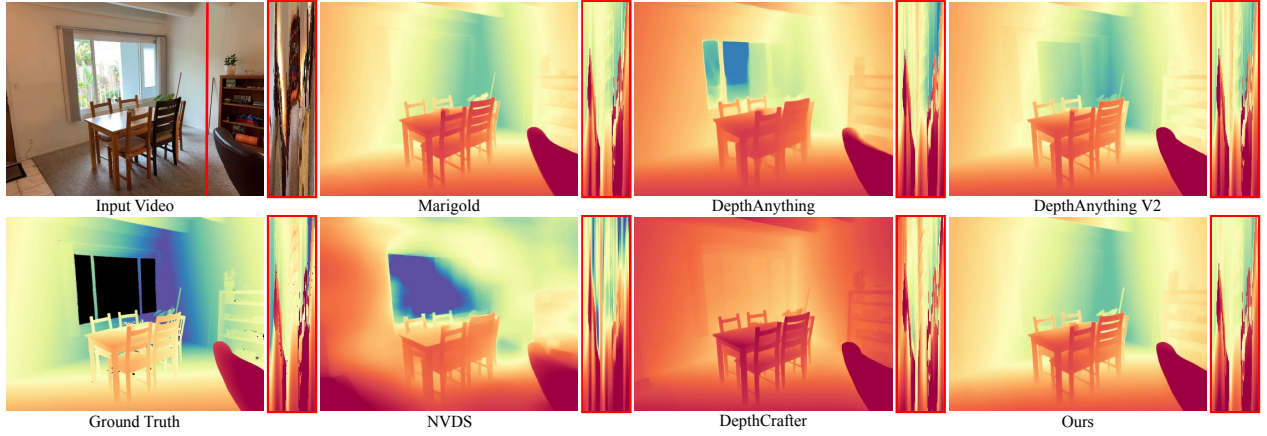

Figure S2. **More qualitative comparison for video depth estimation.** Results on *ScanNet++* dataset.

### A. Details on Evaluation Protocol

**Datasets.** The sequences on *KITTI-360* we chose follows the rules below. Given the absence of ground-truth poses for the initial frames of each sequence, we extracted frames 300-500, ultimately utilizing 200 frames for evaluation.

**Metrics.** To measure *temporal consistency*, we introduce multi-frame consistency (*MFC*): given two depth maps  $D^m, D^n \in \mathcal{R}^{W \times H}$  at frame  $m, n$  of the video sequence, we unproject  $D^m$  into a point cloud; using the ground-truth world-to-camera poses  $P_m, P_n \in \mathcal{R}^{3 \times 4}$  for frames  $m, n$ , camera, we transform the point cloud from frame  $m$ ' camera space to frame  $n$ ' camera space, and project it onto frame  $n$ 's image plane to yield  $D^{m \rightarrow n}$ . We measure temporal consistency as the average L1 distance between  $D^{m \rightarrow n}$  and  $D^n$ . We mask out invalid pixels in both frames. In practice, we calculate multi-frame consistency on adjacent frames.

### B. Detailed Proof on Mathematical Rigor and Fluctuating Guidance

To ensure enough context information, we aim to sample depth latents  $\hat{\mathbf{z}}^{(\mathbf{d}_{W:F})}$  conditioned on  $\hat{\mathbf{z}}^{(\mathbf{d}_{0:W})}$ , which is  $p_\theta(\hat{\mathbf{z}}^{(\mathbf{d}_{W:F})} | \hat{\mathbf{z}}^{(\mathbf{d}_{0:W})})$ . **For the replacement trick**, the sampling of  $\hat{\mathbf{z}}^{(\mathbf{d}_{W:F})}$  follows standard unconditional sampling from  $p_\theta(\hat{\mathbf{z}}^{(\mathbf{d}_{0:F})} | \hat{\mathbf{z}}^{(\mathbf{d}_{0:F})})$ , where  $\hat{\mathbf{z}}^{(\mathbf{d}_{0:F})} = [\hat{\mathbf{z}}^{(\mathbf{d}_{0:W})}, \hat{\mathbf{z}}^{(\mathbf{d}_{W:F})}]$ . Crucially, samples  $\hat{\mathbf{z}}^{(\mathbf{d}_{0:W})}$  are replaced at each step by exact forward process samples  $q(\hat{\mathbf{z}}^{(\mathbf{d}_{0:W})} | \hat{\mathbf{z}}^{(\mathbf{d}_{0:W})})$ . This causes to update  $\hat{\mathbf{z}}^{(\mathbf{d}_{W:F})}$  using  $\hat{\mathbf{z}}^{(\mathbf{d}_{W:F})}(\hat{\mathbf{z}}^{(\mathbf{d}_{W:F})}) \approx \mathbb{E}_q[\hat{\mathbf{z}}^{(\mathbf{d}_{W:F})} | \hat{\mathbf{z}}^{(\mathbf{d}_{W:F})}, \hat{\mathbf{z}}^{(\mathbf{d}_{0:W})}]$ , while what is needed instead is  $\mathbb{E}_q[\hat{\mathbf{z}}^{(\mathbf{d}_{W:F})} | \hat{\mathbf{z}}^{(\mathbf{d}_{W:F})}, \hat{\mathbf{z}}^{(\mathbf{d}_{0:W})}] = \mathbb{E}_q[\hat{\mathbf{z}}^{(\mathbf{d}_{W:F})} | \hat{\mathbf{z}}^{(\mathbf{d}_{0:F})}, \hat{\mathbf{z}}^{(\mathbf{d}_{0:W})}] + (\sigma_t^2 / \alpha_t) \nabla_{\hat{\mathbf{z}}^{(\mathbf{d}_{W:F})}} \log q(\hat{\mathbf{z}}^{(\mathbf{d}_{0:W})} | \hat{\mathbf{z}}^{(\mathbf{d}_{0:W})})$ . The missing second term introduces dynamic guidance variations across sampling steps. **As for our context-aware strategy**, we

|                     |             | Marigold | DAv2  | NVDS  | DC   | Ours |
|---------------------|-------------|----------|-------|-------|------|------|
| Inference Speed (s) |             | 5.64     | 0.80  | 1.05  | 1.30 | 0.49 |
| Compute (GB)        |             | 5.67     | 23.7  | 20.5  | 8.04 | 6.6  |
| # of Parameters (B) |             | 1.29     | 0.33  | 0.35  | 2.25 | 2.25 |
| Training data       | # of frames | 74K      | 62.6M | 1.4M  | -    | 39K  |
|                     | # of scenes | -        | -     | 14.2K | 203K | 938  |

Table S1. Speed and compute comparison.

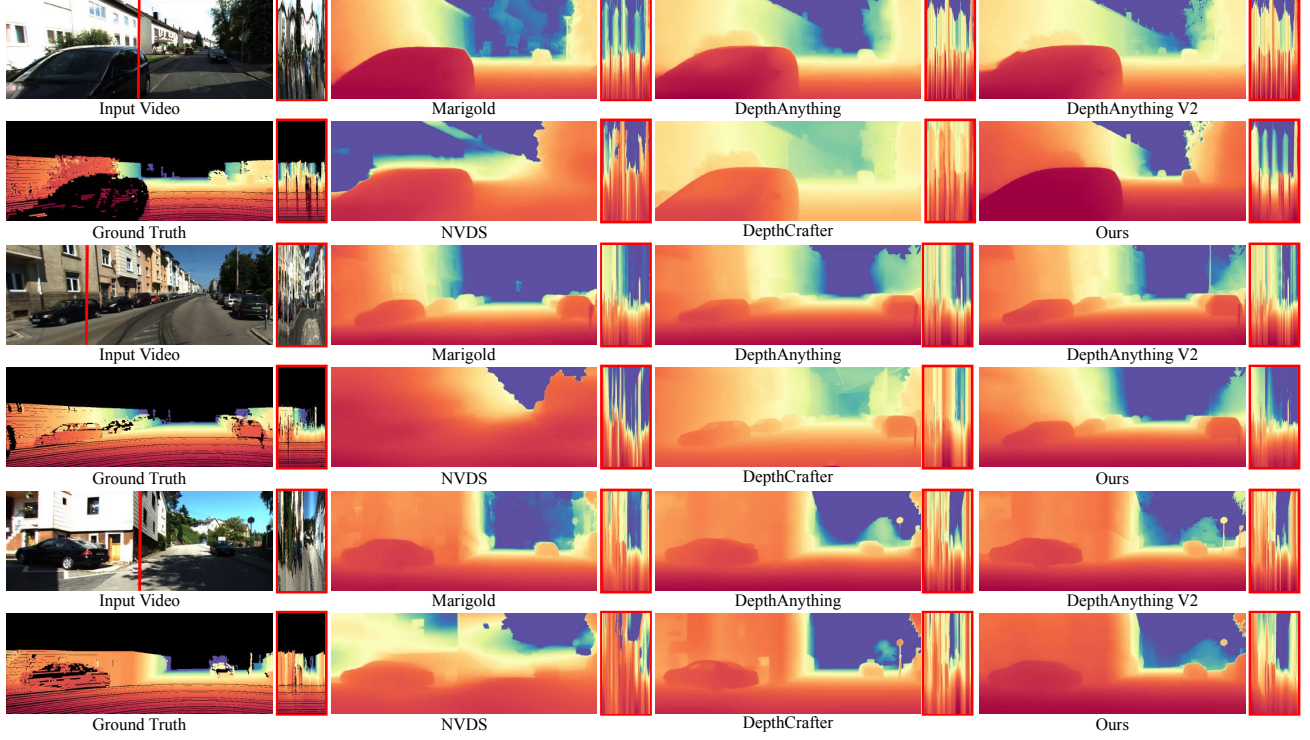

Figure S3. More qualitative comparison for video depth estimation. Results on KITTI-360 datasets.

can do conditional sampling from  $p_\theta(\hat{\mathbf{z}}_{t-1}^{(\mathbf{d}_{0:F})} | \hat{\mathbf{z}}_t^{(\mathbf{d}_{0:F})})$ , with  $\hat{\mathbf{z}}_t^{(\mathbf{d}_{0:F})} = [\hat{\mathbf{z}}_t^{(\mathbf{d}_{0:W})}, \hat{\mathbf{z}}_t^{(\mathbf{d}_{W:F})}]$  without forward process  $q(\cdot|\cdot)$ . As a result,  $\hat{\mathbf{z}}_{t-1}^{(\mathbf{d}_{0:F})}$  is updated in the direction provided by  $\mathbb{E}[\hat{\mathbf{z}}_{t-1}^{(\mathbf{d}_{W:F})} | \hat{\mathbf{z}}_t^{(\mathbf{d}_{W:F})}, \hat{\mathbf{z}}_t^{(\mathbf{d}_{0:W})}]$ .

### C. Speed and Compute Comparison

Tab. S1 shows runtime, compute and model parameters. ChronoDepth is significantly faster than Marigold [40] and DepthCrafter (DC) [33], and requires a fraction of the memory used by DepthAnything v2(DAv2) [76], thanks to our more lightweight UNet architecture compared with the baselines.

### D. Additional Ablation

We investigate the significance of the small noise level  $\sigma_\epsilon$  in the context of overlapping frames within arbitrarily long videos. As illustrated in Fig. S1, an excessively small  $\sigma_\epsilon$

results in degraded spatial and temporal performance due to compounded errors. Conversely, an overly large  $\sigma_\epsilon$  also leads to diminished spatial and temporal performance. Consequently, we opt for  $\sigma_\epsilon = -4$ .

### E. More Qualitative Results

We provide more qualitative comparisons from KITTI-360, ScanNet++ and Bonn datasets in Figs. S2 to S4. First, we highlight the remarkable spatial accuracy achieved by our method, being comparable to or even better than the one by state-of-the-art models. Furthermore, we can notice how the y-t slice by most methods shows high-frequency artifacts, whereas ours is consistently smoother, confirming the superior temporal consistency we achieve.

### F. Limitation

Our method is robust to rapid ego-camera motion (ScanNet++) and long video (KITTI-360). However, we observe

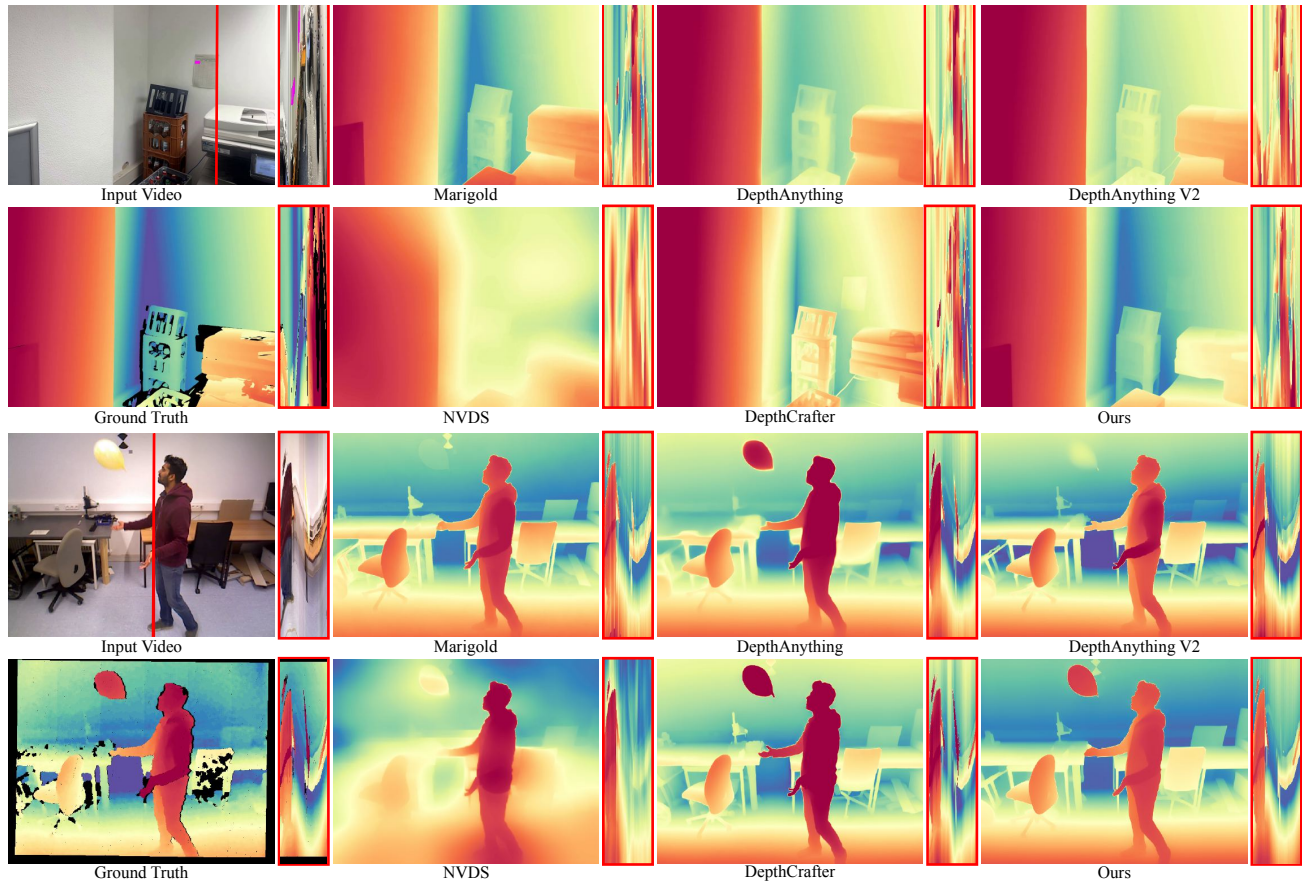

Figure S4. **More qualitative comparison for video depth estimation.** Results on *ScanNet++* and *Bonn* datasets.

a slight degradation in *AbsRel* when handling scenes with abundant dynamic objects (*Sintel*). We attribute this to the limited moving objects in the training data, which can be extended in the future.
